# Supplementary material for: Virus Prevalence in Egg Samples Collected from Naturally Selected and Traditionally Managed Honey Bee Colonies across Europe
Source: MDPI journal article supplement (doi:10.3390/v14112442), 2022-11-03
Supplement: s1 [file s1]

## Supplementary information

### Supplementary Table S1: Primer sequences

Overview of the primers used in this study.

| Virus          | Primers     | Sequence '5-'3                          | Amplicon size (bp) | Ref   |
|----------------|-------------|-----------------------------------------|--------------------|-------|
| ABPV complex   | ABPV-F      | 5'-TCA TAC CTG CCG ATC AAG-3'           | 197                | [126] |
|                | ABPV-R      | 5'-CTG AAT AAT ACT GTG CGT ATC-3'       |                    |       |
| SBV            | SBV-F       | 5'-TTG GAA CTA CGC ATT CTC TG-3'        | 335                | [127] |
|                | SBV-R       | 5'-GCT CTA ACC TCG CAT CAA C-3'         |                    |       |
| BQCV           | BQCV-F      | 5'-AGT GGC GGA GAT GTA TGC-3'           | 294                | [127] |
|                | BQCV-R      | 5'-GGA GGT GAA GTG GCT ATA TC-3'        |                    |       |
| DWV-A          | DWV-F       | 5'-TTC ATT AAA GCC ACC TGG AAC ATC-3'   | 136                | [128] |
|                | DWV-R       | 5'-TTT CCT CAT TAA CTG TGT CGT TGA-3'   |                    |       |
| DWV-B          | VDV-F2      | 5'-TAT CTT CAT TAA AAC CGC CAG GCT-3'   | 140                | [129] |
|                | VDV-R2a     | 5'-CTT CCT CAT TAA CTG AGT TGT TGT C-3' |                    |       |
| DWV complex    | DWV_F8688   | 5'-GGT AAG CGA TGG TTG TTT G-3'         | 143                | [130] |
|                | DWV_B8794 R | 5'-CCG TGA ATA TAG TGT GAG G-3'         |                    |       |
| $\beta$ -actin | ACTINE-F    | 5'-CGT GCC GAT AGT ATT CTT G-3'         | 271                | [71]  |
|                | ACTINE-R    | 5'-CTT GTC ACC AAC ATA GG-3'            |                    |       |

*Supplementary Figure S1: Comparison PCR and qRT-PCR*

Comparison between gel based RT-PCR and qRT-PCR. All selected samples were positive on RT-qPCR for the represented virus in a  $10^1$ - $10^8$  range / 10 eggs. For each virus, a positive and negative control is included. Each PCR included cDNA from 200 ng of RNA as described in the materials and methods section.

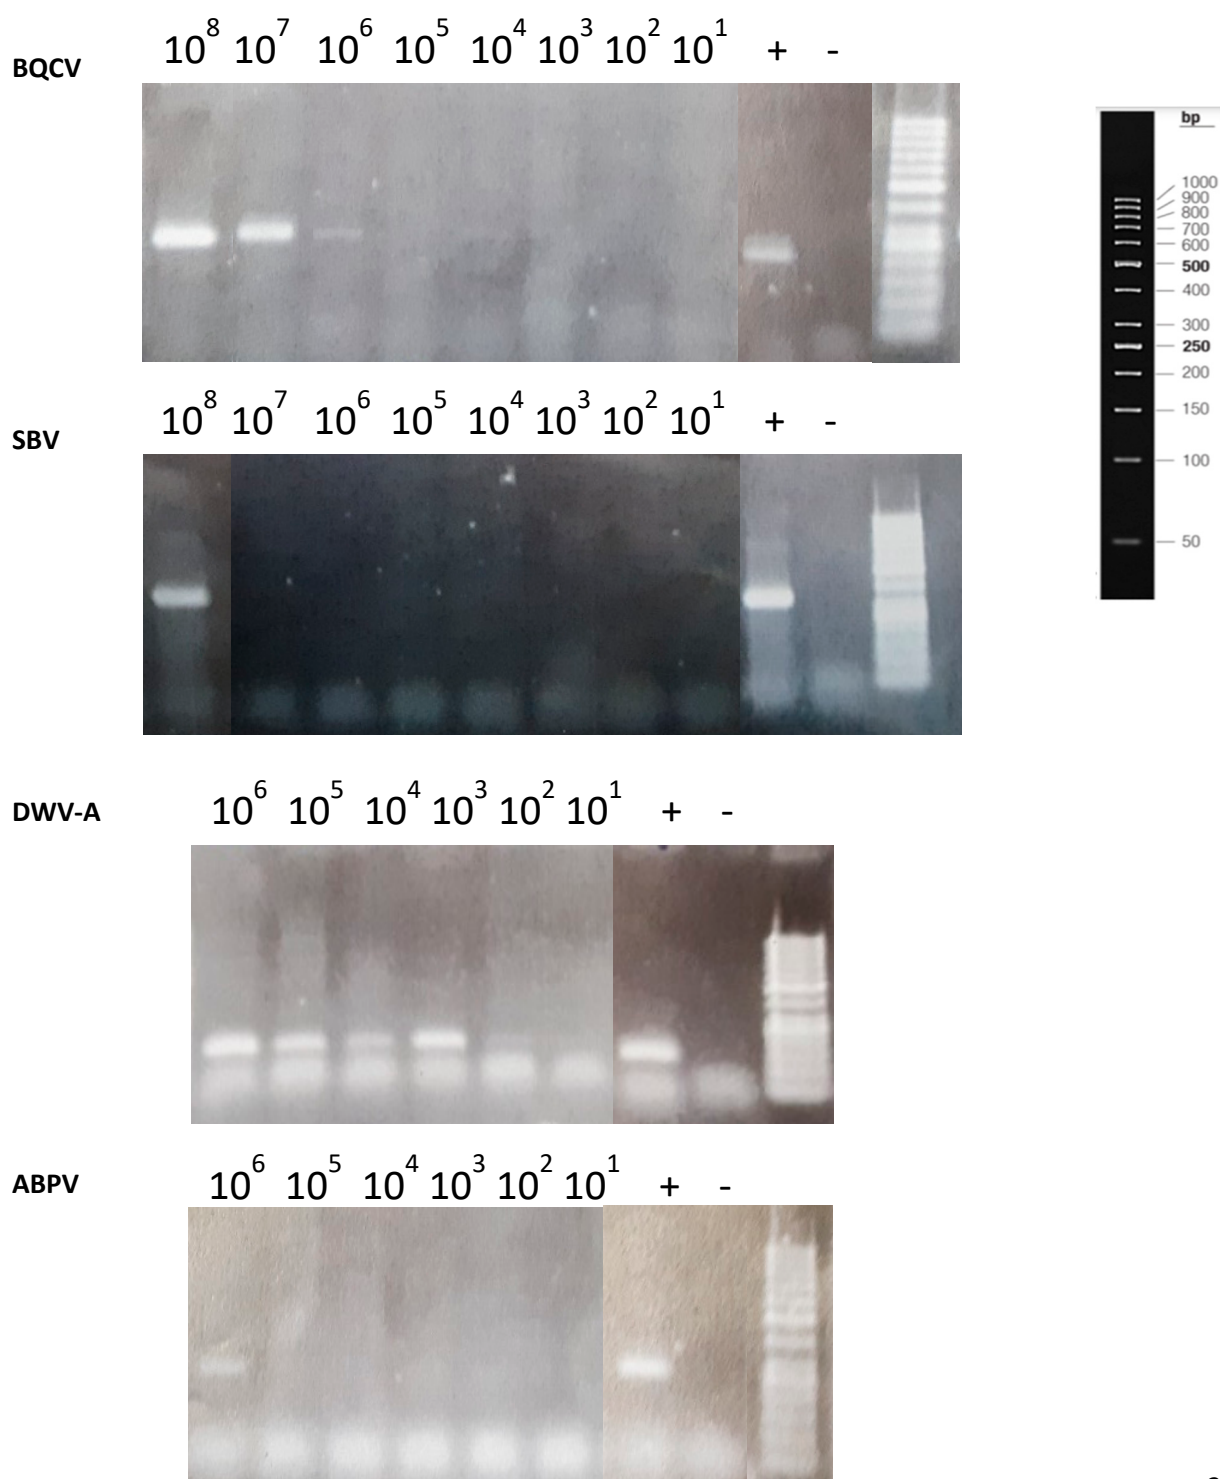

Supplementary Table S2: Additional information European Screening

Overview of supplementary information on the samples collected from each country.

| Country     | Sampling season   | Subspecies                                                                        | Nr of worker eggs on total number of samples | Colony health remarks                     | Location of sampled populations                                       | Year of establishment of NSC |
|-------------|-------------------|-----------------------------------------------------------------------------------|----------------------------------------------|-------------------------------------------|-----------------------------------------------------------------------|------------------------------|
| Belgium     | Spring            | <i>A.m. mellifera</i>                                                             | 0 of 21                                      | Signs of SBV                              | NSC: Bosland<br>TMC: Tessenderlo                                      | 2019                         |
| Croatia     | Summer            | <i>A.m. carnica</i>                                                               | 0 of 10                                      |                                           | TMC: Gorica                                                           |                              |
| France      | Spring            | <i>A.m. carnica</i> ,<br><i>buckfast</i> and<br><i>ligustica</i>                  | 0 of 26                                      | 1 colony with European foulbrood          | NSC: Gragnague, Verfeil, Garidech, Puchin<br>TMC: Orgueil, Beaudésert | 2018                         |
| Netherlands | Spring and summer | <i>A.m. mellifera</i>                                                             | 0 of 16                                      |                                           | NSC: Lelystad<br>TMC: Lelystad                                        | 2008                         |
| Norway      | Summer            | <i>Hybrids between A.m. buckfast and carnica</i>                                  | 16 of 20                                     |                                           | NSC: Ask, Reinertsen<br>TMC: Skutelandet, Borgerskogen                | 1997                         |
| Portugal    | Spring            | <i>A.m. iberiensis</i>                                                            | 0 of 10                                      |                                           | TMC: Girmonde                                                         |                              |
| Romania     | Spring            | <i>A.m. carpatica</i>                                                             | 0 of 13                                      |                                           | NSC: Palocsay Cluj Napoca<br>TMC: Palacay, USAMV, Salaj               | 2019                         |
| Slovenia    | Spring            | <i>A.m. carnica</i>                                                               | 0 of 72                                      |                                           | TMC: across Slovenia                                                  |                              |
| Spain       | Spring            | <i>A.m. iberiensis</i>                                                            | 0 of 10                                      |                                           | TMC: Arbeiza                                                          |                              |
| Sweden      | Summer            | hybrids between <i>A.m. carnica</i> ,<br><i>ligustica</i> and<br><i>mellifera</i> | 18 of 18                                     | signs of DWV, chalkbrood and possibly EFB | NSC: Näsudden (also referred to as Gotland bees)<br>TMC: Sigarve      | 1999                         |
